# Supplementary material
Source: ML conference proceedings conference paper supplement (https://www.ecva.net/papers/eccv_2020/papers_ECCV/html/123630698_ECCV_2020_paper.php)
Supplement: Supplementary file 1 [file 123630698-supp.pdf]

# Supplementary Material: Polynomial Regression Network for Variable-Number Lane Detection

Bingke Wang, Zilei Wang\*, and Yixin Zhang

University of Science and Technology of China  
{wbkup,zhyx12}@mail.ustc.edu.cn zlwang@ustc.edu.cn

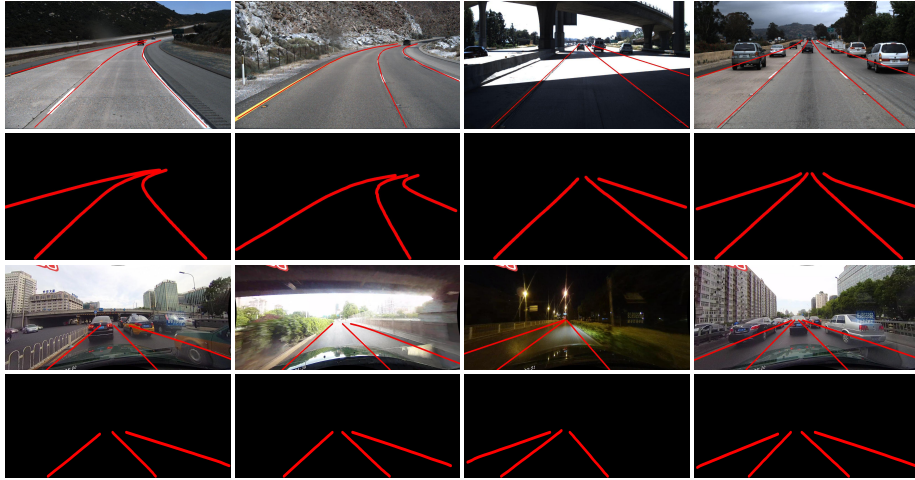

**Fig. 1.** More visualization results. Row 1 and 3: images with ground truth on TuSimple and CULane datasets respectively. Row 2 and 4: the corresponding visualization results of our PRNet.

## 1 More visualization results.

Here we show more visualization results of our method in Figure 1. It can be seen that our PRNet could handle the complex scenarios well.
